# Supplementary material for: Normal Fasting Plasma Glucose and Risk of Type 2 Diabetes
Source: Oxford University Press journal article supplement (doi:10.2337/dc10-2263), 2011-04-16
Supplement: dc102263supplementarydata.pdf [file dc102263supplementarydata.pdf]

# SUPPLEMENTARY DATA

**Longitudinal assessment (1992-2008) for progression to diabetes in 13,845 subjects (40-69 years old).**

**Supplementary Table 1.** Life table of cumulative type 2 diabetes incidence by category of normal fasting plasma glucose

|                           | <b>Diabetes incidence according to categories of normal fasting plasma glucose</b> |                    |                    |
|---------------------------|------------------------------------------------------------------------------------|--------------------|--------------------|
|                           | <b>51-82 mg/dL</b>                                                                 | <b>83-90 mg/dL</b> | <b>91-99 mg/dL</b> |
| <b>Years of follow up</b> |                                                                                    |                    |                    |
| 0                         | 0,00%                                                                              | 0,00%              | 0,00%              |
| 3                         | 0,08%                                                                              | 0,16%              | 0,50%              |
| 6                         | 0,29%                                                                              | 0,32%              | 2,71%              |
| 9                         | 0,59%                                                                              | 1,56%              | 6,82%              |
| 12                        | 1,67%                                                                              | 4,56%              | 12,83%             |
| 15                        | 3,54%                                                                              | 7,80%              | 25,86%             |

SUPPLEMENTARY DATA

**Supplementary Figure 1.** Plot of cumulative type 2 diabetes incidence by category of normal fasting plasma glucose

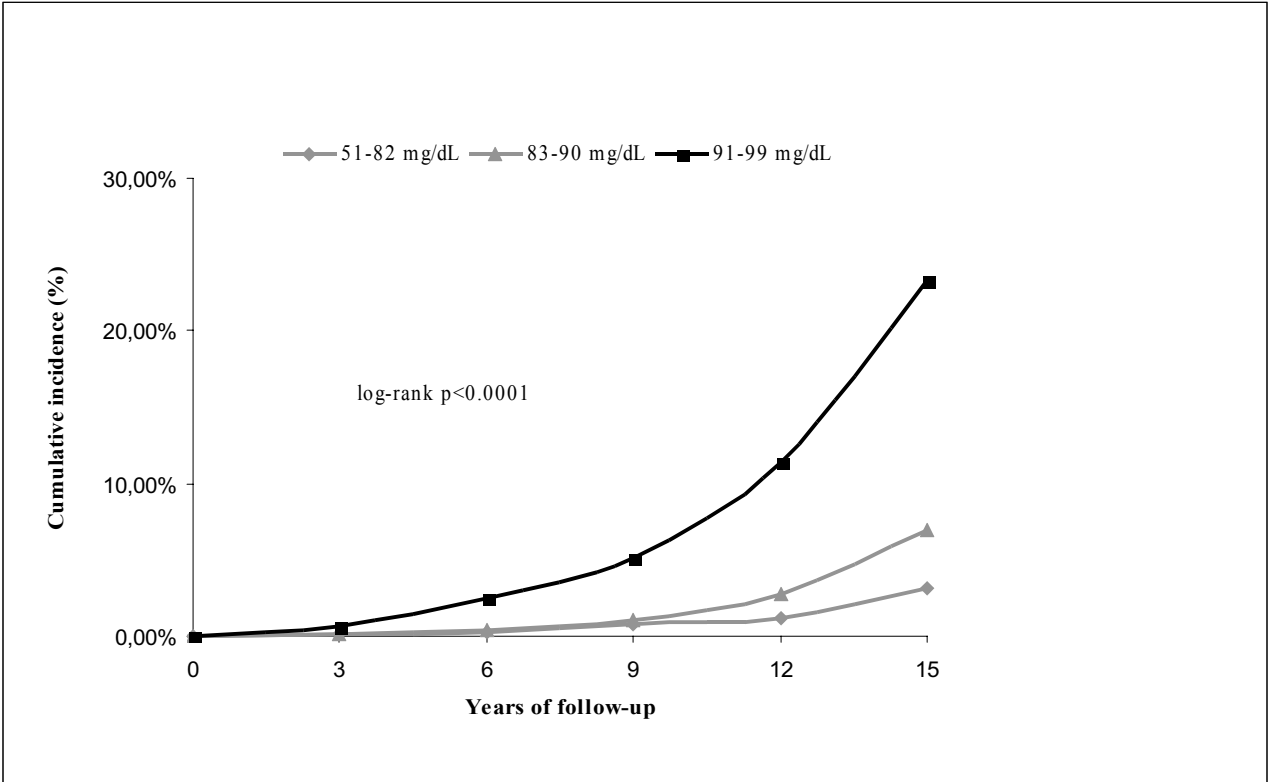

At the end of the observation period 307 incident cases of type 2 diabetes were reported
